# Supplementary material for: Enhanced performance of all-organic sandwich structured dielectrics with linear dielectric and ferroelectric polymers
Source: Royal Society of Chemistry journal article supplement (doi:10.1039/d1ta00974e), 2021-01-01
Supplement: d1ta00974e1.pdf [file d1ta00974e1.pdf]

## Supporting Information

### **Enhanced performance of all-organic sandwich structured dielectrics with linear dielectric and ferroelectric polymer**

Chao Wang<sup>a</sup>, Guanghu He<sup>a</sup>, Sheng Chen<sup>\*a</sup>, Hang Luo<sup>\*b</sup> and Dou Zhang<sup>b</sup>

<sup>a</sup>. *Key Laboratory of Polymeric Materials and Application Technology of Hunan Province, College of Chemistry, Xiangtan University, Xiangtan 411105, Hunan Province, China. E-mail: chensheng0729@xtu.edu.cn*

<sup>b</sup>. *State Key Laboratory of Powder Metallurgy, Central South University, Changsha, Hunan 410083, China*

## **Characterization**

The morphology of raw sepiolite nanofibers, modified sepiolite nanofibers and nanocomposites were characterized by scanning electron microscopy (SEM, JSM-6390). Differential scanning calorimetry (DSC) traces of the nanocomposites were obtained using a TA Q10 DSC instrument at a heating rates of 10 °C/min during the first heating process. 1D WAXD experiments were performed on a BRUKER AXS D8 advance diffractometer with a 40 kV FL tubes as the X-ray source (Cu Ka) and a LYNXEYE\_XE detector. Gold electrodes with a thickness of 100 nm and a diameter of 2 mm were sputtered on two sides of films. The dielectric performance was measured using an Agilent 4294A LCR meter with a frequency range from 1 kHz to 10 MHz at room temperature. The polarization-electric field hysteresis loops of the composites were performed at 10 Hz by a TF analyzer 2000 ferroelectric polarization tester (aixACT, Germany). The energy storage performance was calculated according to the P-E loops (The test voltage range is 0-10kV, the temperature range is 25-125°C).

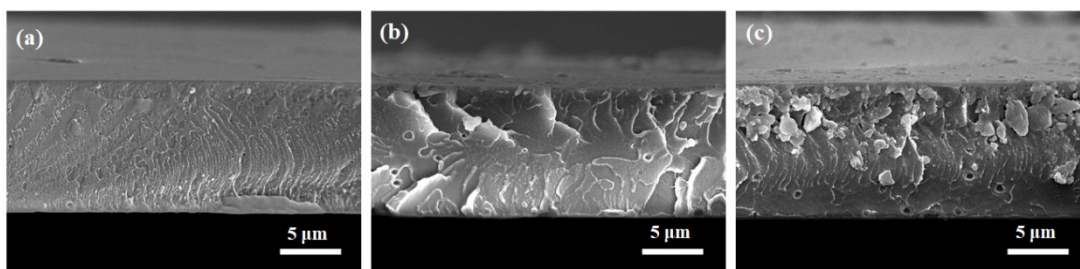

Figure S1 The Cross section SEM image of the (a) 4 vol%, (b) 5 vol% and (c) 6 vol% PVTC/PEI blending films

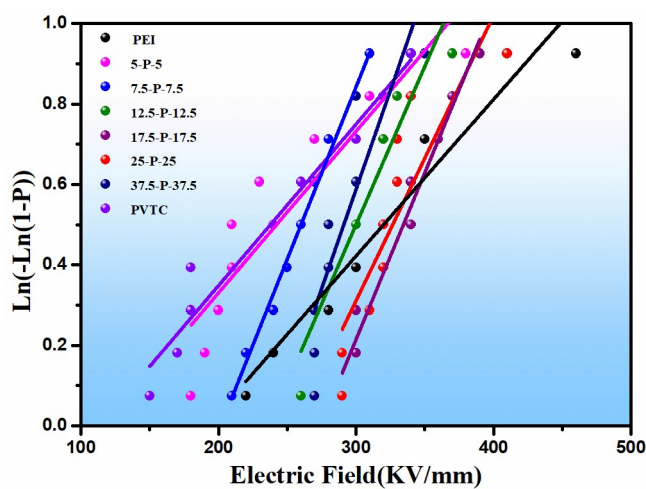

Figure S2. Weibull distribution of reverse-sandwich structured polymer films with different PVTC volume fractions.

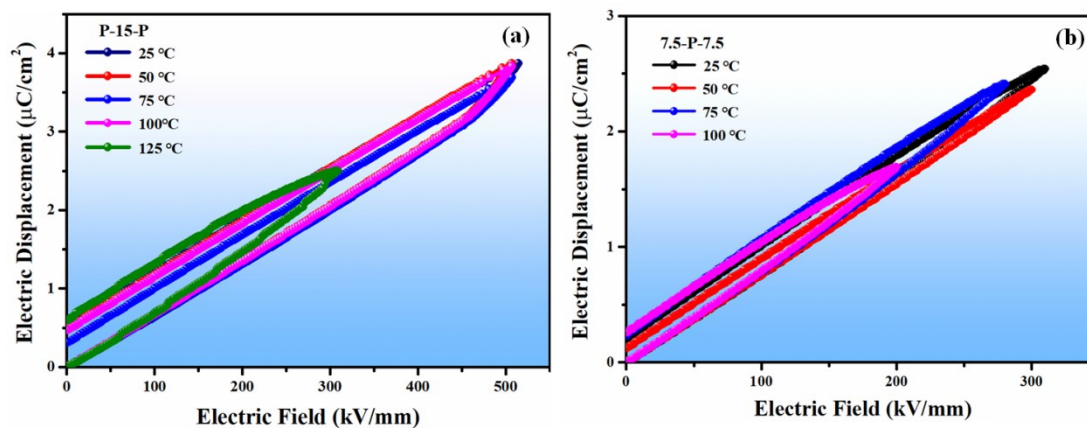

Figure S3. The D-E loops of (a) positive-sandwich structured film P-15-P and (b) reverse-sandwich structured film 7.5-P-7.5 under different temperatures

Table S1. The local electric fields in various layers of positive-sandwich structured films at different electric fields

| Sample | 200MV/m |      | 300MV/m |      | 400MV/m |      | 500MV/m |      |
|--------|---------|------|---------|------|---------|------|---------|------|
|        | PEI     | PVTC | PEI     | PVTC | PEI     | PVTC | PEI     | PVTC |
| P-5-P  | 208     | 36   | 313     | 54   | 417     | 72   | 521     | 90   |
| P-10-P | 218     | 38   | 327     | 57   | 436     | 76   | 545     | 95   |
| P-15-P | 228     | 40   | 342     | 59   | 455     | 79   | 569     | 99   |
| P-25-P | 255     | 44   | 383     | 66   | 510     | 88   | 638     | 111  |
| P-40-P | 301     | 52   | 451     | 78   | 601     | 104  | 751     | 130  |
| P-60-P | 404     | 70   | 606     | 105  | 808     | 140  | 1010    | 175  |
| P-80-P | 598     | 104  | 897     | 155  | 1195    | 207  | 1494    | 259  |

Table S2. The local electric fields in various layers of reverse-sandwich structured films at different electric fields

| Sample      | 200MV/m |      | 300MV/m |      | 400MV/m |      | 500MV/m |      |
|-------------|---------|------|---------|------|---------|------|---------|------|
|             | PEI     | PVTC | PEI     | PVTC | PEI     | PVTC | PEI     | PVTC |
| 5-P-5       | 218     | 38   | 327     | 57   | 436     | 76   | 545     | 95   |
| 7.5-P-7.5   | 228     | 40   | 343     | 59   | 456     | 79   | 571     | 99   |
| 12.5-P-12.5 | 252     | 44   | 378     | 66   | 504     | 87   | 630     | 109  |
| 17.5-P-17.5 | 281     | 49   | 422     | 73   | 563     | 98   | 704     | 121  |
| 25-P-25     | 341     | 59   | 511     | 89   | 682     | 118  | 852     | 148  |
| 37.5-P-37.5 | 526     | 91   | 790     | 137  | 1053    | 182  | 1316    | 228  |
